# Supplementary material for: A Comparison of Phenotypic Traits Related to Trypanotolerance in Five West African Cattle Breeds Highlights the Value of Shorthorn Taurine Breeds
Source: PubMed Central journal article supplement (PMC4425517; doi:10.1371/journal.pone.0126498), 2015-05-08

**A.**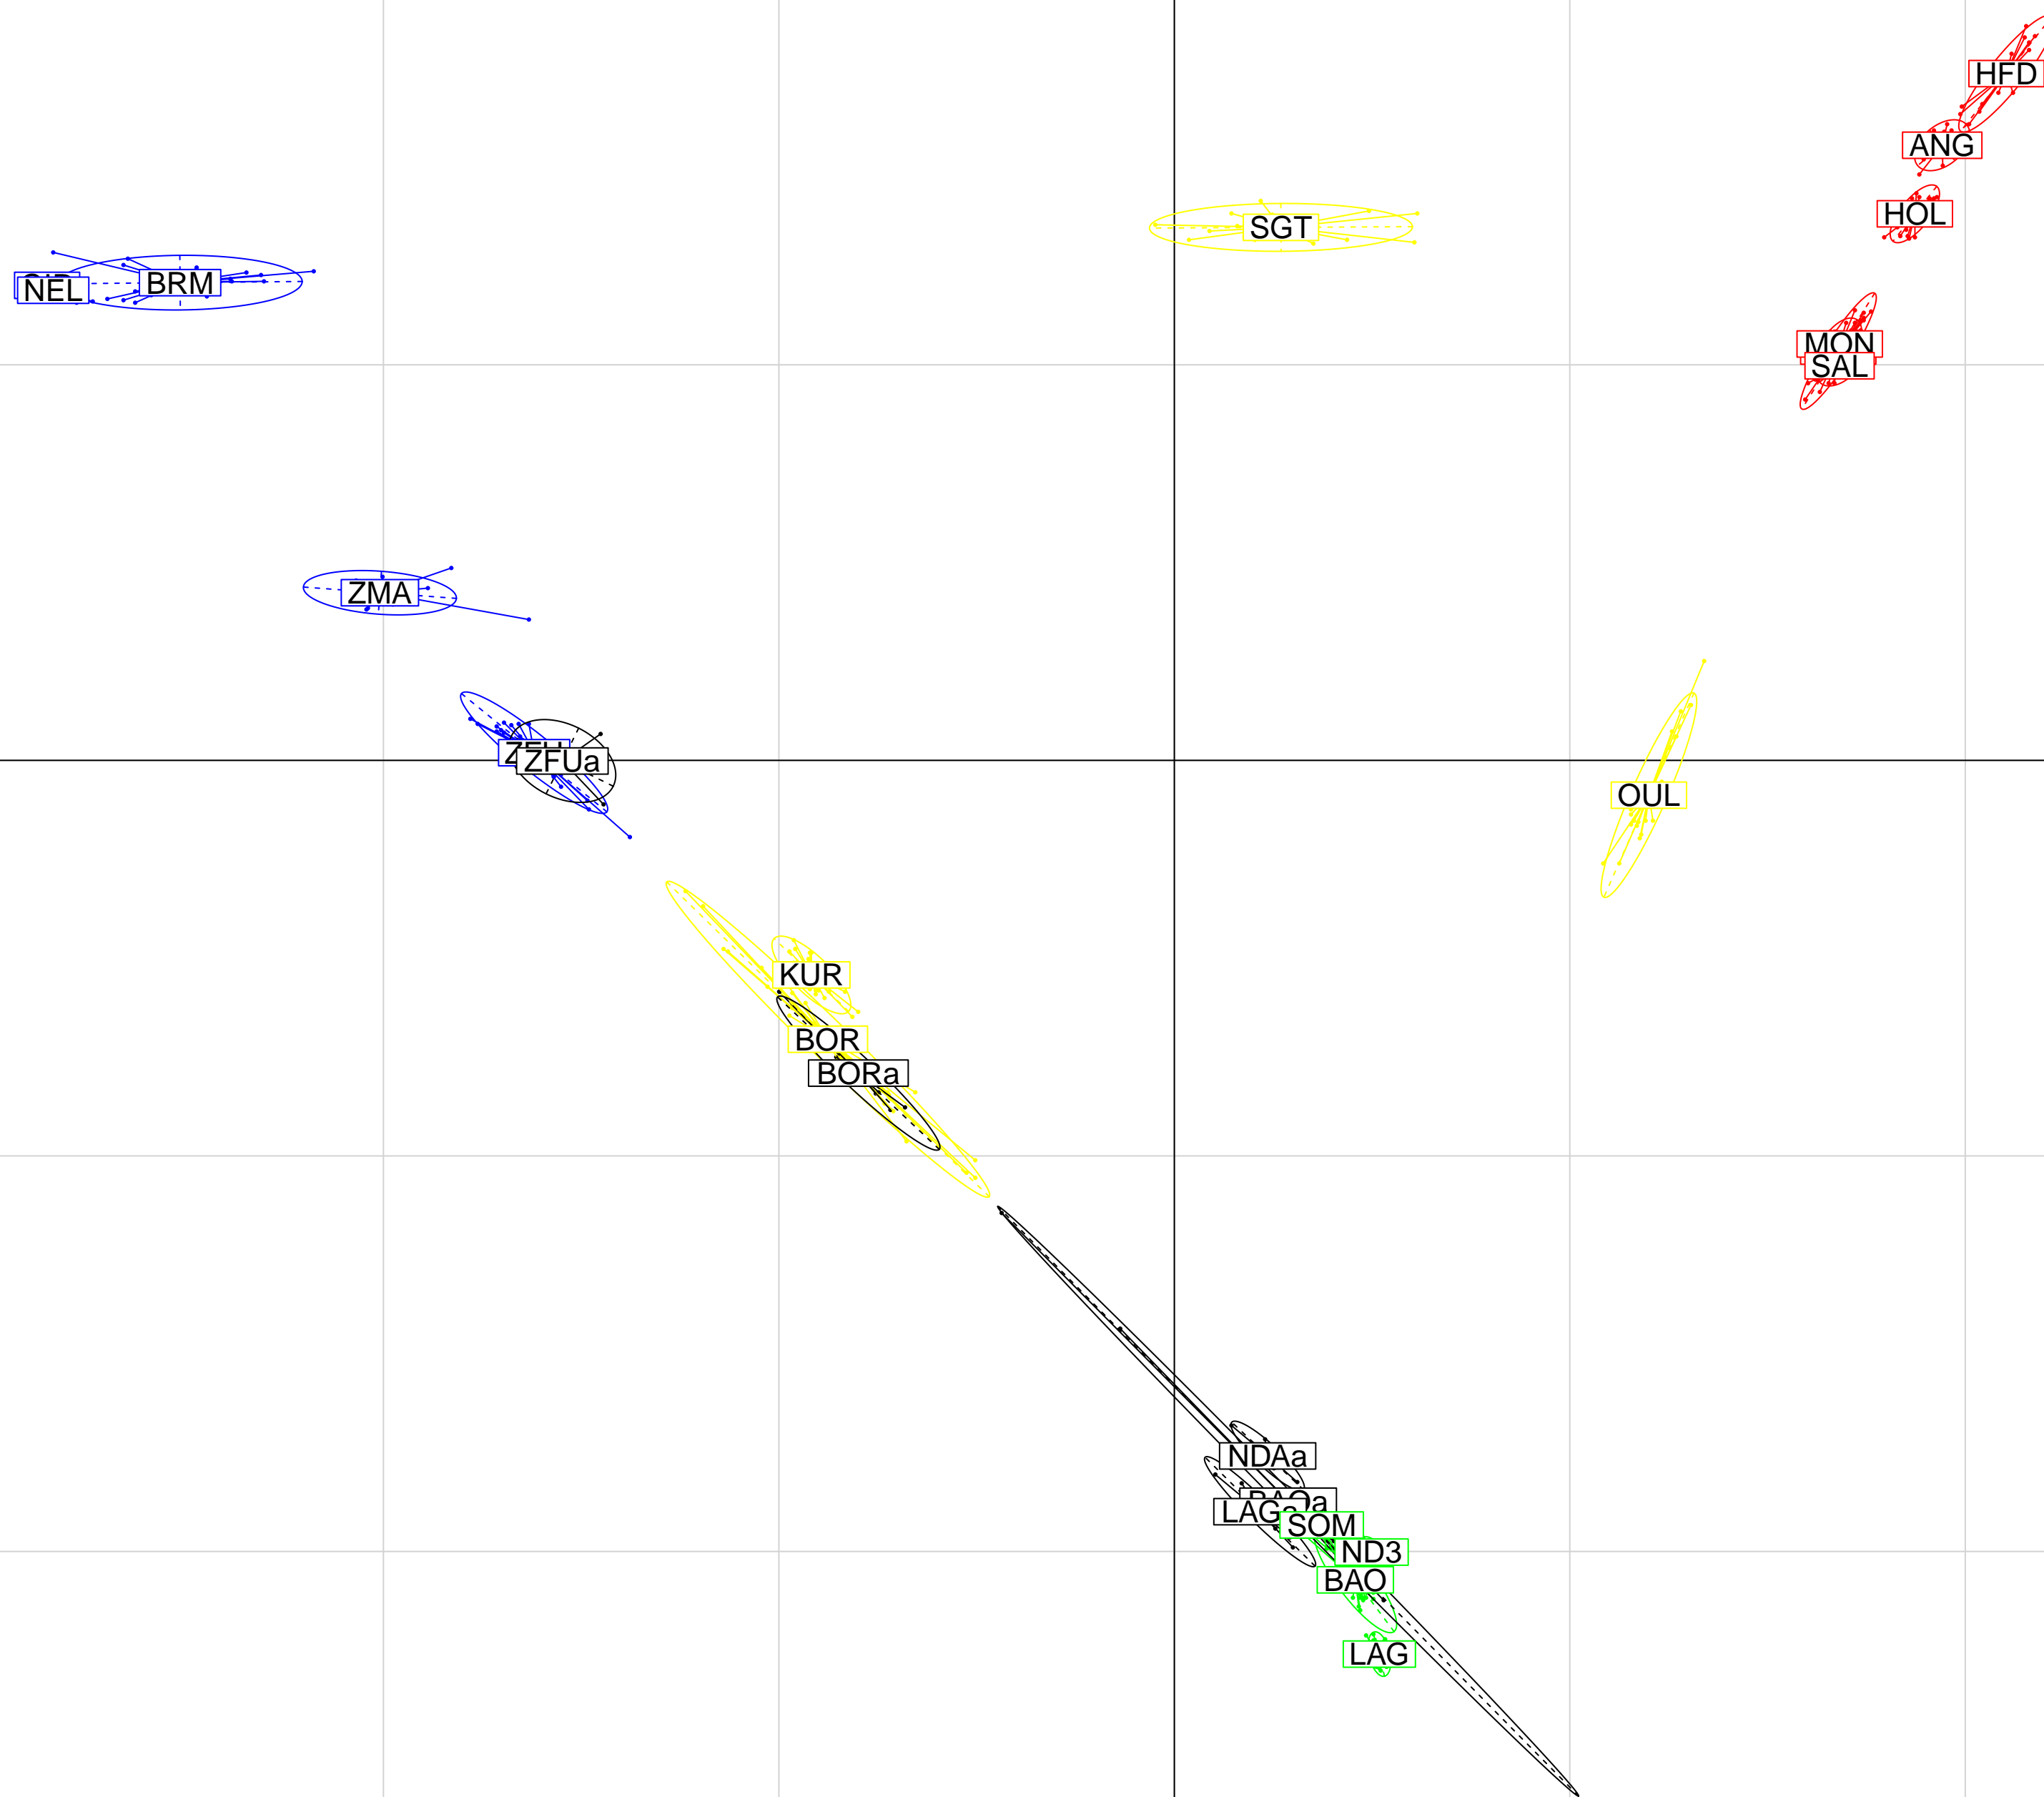**B.**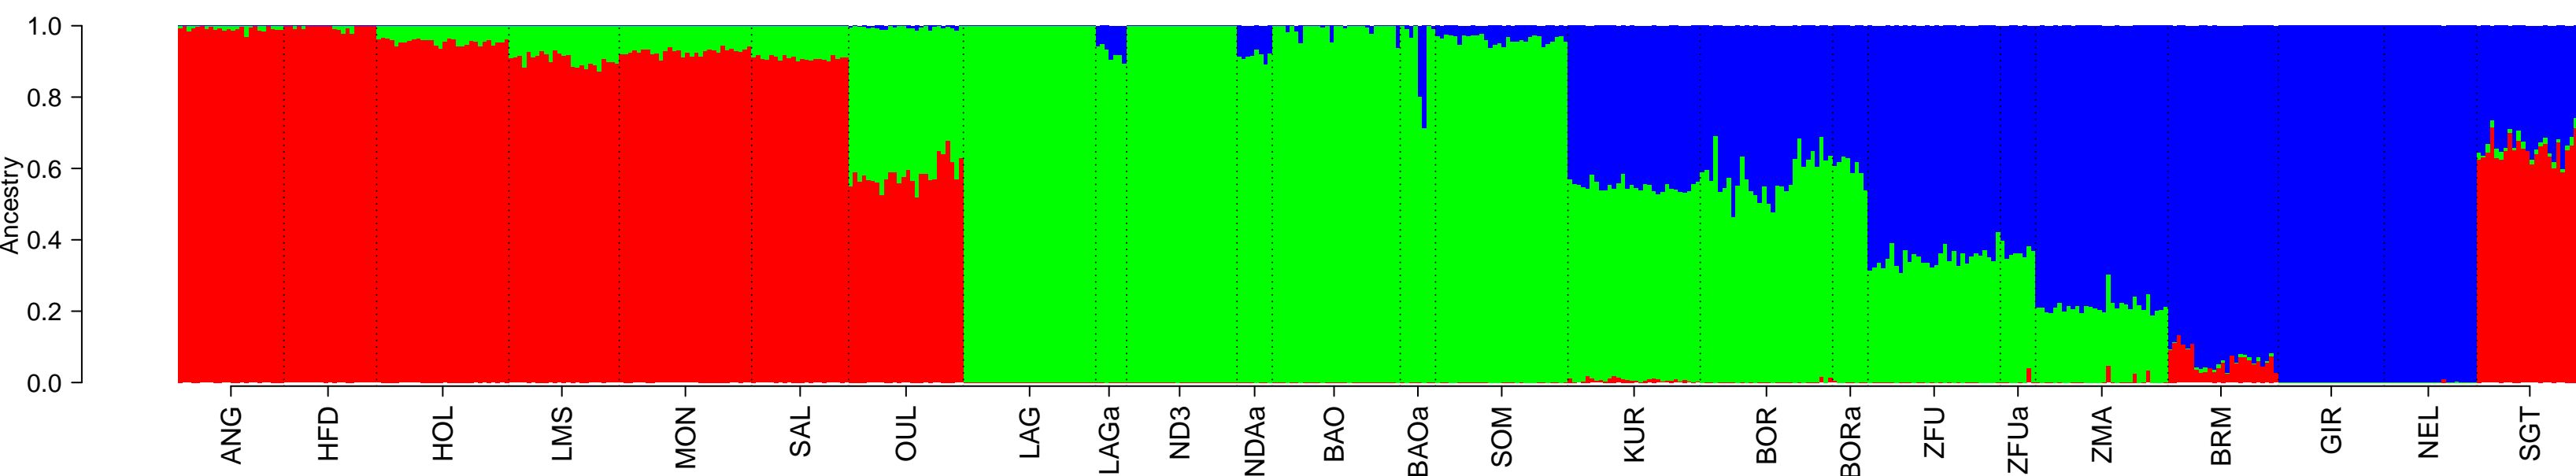

Supplement: pone.0126498.s001.pdf [file pone.0126498.s001.pdf]
